# Supplementary material for: Unconventional polarization fatigue in van der Waals layered ferroelectric ionic conductor CuInP2S6
Source: PubMed Central journal article supplement (PMC10716391; doi:10.1038/s41467-023-44132-y), 2023-12-12
Supplement: 41467_2023_44132_MOESM3_ESM.pdf [file 41467_2023_44132_MOESM3_ESM.pdf]

## **Description of additional supplementary files**

**Supplementary Movie 1** – Time-lapse movie showing the morphological change of CuInP2S6 capacitor under repetitive voltage cycles.

**Supplementary Movie 2** – Real time movie showing the process for scratching a bubble protrusion using micromanipulator probe.

**Supplementary Movie 3** – Animation of atomic motions for P1 vibrational mode.

**Supplementary Movie 4** – Animation of atomic motions for P2 vibrational mode.

**Supplementary Movie 5** – Animation of atomic motions for P3 vibrational mode.

**Supplementary Movie 6** – Animation of atomic motions for P4 vibrational mode.
